# Supplementary material
Source: publisher figshare collection journal article supplement (https://frontiersin.figshare.com/ndownloader/files/17615885)

**Supplementary Table 1.** Overview of general lifestyle and food ingredients used by Fulani and the Jarawa (Non-Fulani) derived from verbal interviews, additional details on the differences in diet are provided in the material and methods section.

|                          | <b>Fulani</b>                                                                                                                                                                                                                                                                                                                           | <b>Jarawa (Non-Fulani)</b>                                                                                                             |
|--------------------------|-----------------------------------------------------------------------------------------------------------------------------------------------------------------------------------------------------------------------------------------------------------------------------------------------------------------------------------------|----------------------------------------------------------------------------------------------------------------------------------------|
| <b>Food</b>              |                                                                                                                                                                                                                                                                                                                                         |                                                                                                                                        |
| Breakfast                | <p>Beverage:<br/> Kunu (a fermented drink made of mixed ground grains) or<br/> Local herbs, Dowrori (Milk),<br/> Biradan (raw fermented milk),<br/> Kosan (cooked fermented milk)</p> <p>Main dish:<br/> Any solid dish made from ground grains such as maize, white and yellow millet along with karkachi (a local vegetable soup)</p> | Tamba (ground local grains), processed foods (meat pie, cake, white bread)                                                             |
| Lunch                    | <p><i>Gote</i> (a local porridge made of ground maize and spinach) is the most preferred option.<br/> Other dishes include yam, local rice, cabbage</p>                                                                                                                                                                                 | Parboiled/refined rice, beans, or grain dishes ( <i>Gaari Masara, Dawa</i> ), Cassava ( <i>Gaari rogo</i> ), yam ( <i>Bawan doya</i> ) |
| Dinner                   | <i>Tuwo shinkafa</i> (a solid dish made with rice grain), or other <i>tuwo</i> (made from other grains) together with bitter leaf soup                                                                                                                                                                                                  | Two dishes, or pasta (indomie, spaghetti)                                                                                              |
| <b>Lifestyle</b>         |                                                                                                                                                                                                                                                                                                                                         |                                                                                                                                        |
| General                  | Nomads, rural environment                                                                                                                                                                                                                                                                                                               | Living in a city                                                                                                                       |
| Profession               | Agriculturalists and traders                                                                                                                                                                                                                                                                                                            | Agriculturalists, civil servants, traders, and students                                                                                |
| Access to medical supply | They do not have easy access to medical supply. They have to travel to Jengre, a nearby town to gain access to medical supply                                                                                                                                                                                                           | Close to a tertiary hospital (Jos University Teaching Hospital, Jos, Plateau State, Nigeria)                                           |
| Water supply             | Water obtained from stream for                                                                                                                                                                                                                                                                                                          | Water obtained from the                                                                                                                |

|  |                                                                                                                                                                               |                           |
|--|-------------------------------------------------------------------------------------------------------------------------------------------------------------------------------|---------------------------|
|  | <p>domestic activities</p> <p>Water obtained from the borehole built by a non-governmental organization (NGO) in 2016 (a few months before the commencement of the study)</p> | <p>borehole and well.</p> |
|--|-------------------------------------------------------------------------------------------------------------------------------------------------------------------------------|---------------------------|

**Supplementary Table 2.** Summary of metadata, including age, for enrolled subjects.

| Sample | Group      | Age [years] | Sex    | Sample | Group  | Age [years] | Sex    |
|--------|------------|-------------|--------|--------|--------|-------------|--------|
| A01    | Non-Fulani | 11          | Female | A24    | Fulani | 25          | Male   |
| A02    | Non-Fulani | 15          | Male   | A25    | Fulani | Adult*      | Male   |
| A03    | Non-Fulani | 30          | Male   | A26    | Fulani | 11          | Female |
| A04    | Non-Fulani | 23          | Female | A27    | Fulani | Adult*      | Male   |
| A06    | Non-Fulani | 28          | Female | A28    | Fulani | 9           | Female |
| A07    | Non-Fulani | 11          | Female | A29    | Fulani | 6           | Male   |
| A08    | Non-Fulani | 20          | Male   | A30    | Fulani | 70          | Female |
| A09    | Non-Fulani | 27          | Male   | A31    | Fulani | 7           | Female |
| A10    | Non-Fulani | 2           | Female | A32    | Fulani | 10          | Female |
| A11    | Non-Fulani | 23          | Female | A33    | Fulani | 15          | Female |
| A12    | Non-Fulani | 5           | Female | A34    | Fulani | 9           | Female |
| A13    | Non-Fulani | 35          | Male   | A35    | Fulani | 4           | Female |
| A14    | Non-Fulani | 53          | Female | A36    | Fulani | 25          | Female |
| A15    | Non-Fulani | 56          | Male   | A37    | Fulani | 6           | Female |
| A16    | Non-Fulani | 37          | Female | A38    | Fulani | 2           | Male   |
| A17    | Non-Fulani | 56          | Female | A39    | Fulani | 10          | Male   |
| A18    | Non-Fulani | 65          | Female | A40    | Fulani | 26          | Female |
| A19    | Non-Fulani | 48          | Female | A41    | Fulani | 8           | Male   |
| A20    | Non-Fulani | 27          | Male   | A42    | Fulani | 34          | Male   |
| A21    | Non-Fulani | 9           | Female | A43    | Fulani | 7           | Male   |
| A22    | Non-Fulani | 28          | Male   | A44    | Fulani | 25          | Female |
| A23    | Non-Fulani | Adult*      | Male   | A45    | Fulani | 12          | Male   |
|        |            |             |        | A46    | Fulani | 12          | Female |
|        |            |             |        | A47    | Fulani | 32          | Female |
|        |            |             |        | A48    | Fulani | 8           | Male   |
|        |            |             |        | A49    | Fulani | 40          | Male   |
|        |            |             |        | A50    | Fulani | 45          | Male   |
|        |            |             |        | A51    | Fulani | 37          | Female |

\* Subjects were adults, the information on their exact age was not provided by these individuals

**Supplementary Table 3.** Summary of p-values [adjusted p-values] for alpha diversity differences between children (age  $\leq 11$ ) and adolescent/adult (age  $> 11$ ) in the Fulani and the Non-Fulani group. Statistical significance was assessed using a two-sided non-parametric t-test at a rarefaction depth of 13100. Benjamini-Hochberg procedure was applied to correct for multiple testing comparisons.

|                    | <b>Fulani</b><br>( <i>children vs. adolescent/adult</i> )<br>p-value [p-value-adjusted] |          | <b>Non-Fulani</b><br>( <i>children vs. adolescent/adult</i> )<br>p-value [p-value-adjusted] |          |
|--------------------|-----------------------------------------------------------------------------------------|----------|---------------------------------------------------------------------------------------------|----------|
| Chao1              | 0.5788                                                                                  | [0.5788] | 0.3980                                                                                      | [0.4451] |
| Observed_species   | 0.5114                                                                                  | [0.5788] | 0.3539                                                                                      | [0.4451] |
| PD_whole_tree      | 0.3107                                                                                  | [0.5788] | 0.4451                                                                                      | [0.4451] |
| Shannon            | 0.4793                                                                                  | [0.5788] | 0.2080                                                                                      | [0.4160] |
| Simpson            | 0.3358                                                                                  | [0.5788] | 0.2080                                                                                      | [0.4160] |
| Simpson_reciprocal | 0.3358                                                                                  | [0.5788] | 0.2080                                                                                      | [0.4160] |

**Supplementary Table 4.** Summary of p-values [adjusted p-values] for beta diversity differences between children (age  $\leq 11$ ) and adolescents/adults (age  $> 11$ ) in the Fulani and the Non-Fulani groups. Statistical significance was assessed by ANOSIM. Benjamini-Hochberg procedure was applied to correct for multiple testing comparisons.

|                    | <b>Fulani</b><br>( <i>children vs. adolescent/adult</i> )<br>p-value [p-value-adjusted] |         | <b>Non-Fulani</b><br>( <i>children vs. adolescent/adult</i> )<br>p-value [p-value-adjusted] |        |
|--------------------|-----------------------------------------------------------------------------------------|---------|---------------------------------------------------------------------------------------------|--------|
| Bray-Curtis        | 0.29                                                                                    | [0.435] | 0.6                                                                                         | [0.63] |
| Unweighted UniFrac | 0.71                                                                                    | [0.71]  | 0.63                                                                                        | [0.63] |
| Weighted Unifrac   | 0.071                                                                                   | [0.213] | 0.329                                                                                       | [0.63] |

**Supplementary Table 5.** Summary of p-values [adjusted p-values] for alpha diversity differences between children (age  $\leq 11$ ) and adolescent/adult (age  $> 11$ ) in the Fulani and the Non-Fulani group. Statistical significance was assessed using a two-sided non-parametric t-test at a rarefaction depth of 13,100. Benjamini-Hochberg procedure was applied to correct for multiple testing comparisons.

|                    | <b>Children Fulani vs. children<br/>Non-Fulani</b><br>p-value [p-value-adjusted] |         | <b>Adolescent/adult Fulani vs<br/>adolescent/adult Non-Fulani</b><br>p-value [p-value-adjusted] |            |
|--------------------|----------------------------------------------------------------------------------|---------|-------------------------------------------------------------------------------------------------|------------|
| Chao1              | 0.38                                                                             | [0.665] | 0.056                                                                                           | [0.056]    |
| Observed_species   | 0.5                                                                              | [0.7]   | 0.017                                                                                           | [0.0198]   |
| PD_whole_tree      | 0.118                                                                            | [0.665] | 0.003                                                                                           | [0.00525]  |
| Shannon            | 0.31                                                                             | [0.665] | 0.0015                                                                                          | [0.0035]   |
| Simpson            | 0.73                                                                             | [0.79]  | 0.0063                                                                                          | [0.008]    |
| Simpson_reciprocal | 0.79                                                                             | [0.79]  | 0.00054                                                                                         | [0.00189]  |
| Evenness           | 0.36                                                                             | [0.665] | 0.00097                                                                                         | [0.000679] |

**Supplementary Table 6.** Summary of p-values [adjusted p-values] for beta diversity differences between children (age  $\leq 11$ ) and adolescents/adults (age  $> 11$ ) between the Fulani and the Non-Fulani. Statistical significance was assessed by ANOSIM. Benjamini-Hochberg procedure was applied to correct for multiple testing comparisons.

|                    | <b>Children Fulani vs.<br/>children Non-Fulani</b><br>p-value [p-value-adjusted] |         | <b>Adolescent/adult Fulani vs<br/>adolescent/adult Non-Fulani</b><br>p-value [p-value-adjusted] |          |
|--------------------|----------------------------------------------------------------------------------|---------|-------------------------------------------------------------------------------------------------|----------|
| Bray-Curtis        | 0.007                                                                            | [0.021] | 0.012                                                                                           | [0.012]  |
| Unweighted UniFrac | 0.018                                                                            | [0.027] | 0.007                                                                                           | [0.0105] |
| Weighted Unifrac   | 0.057                                                                            | [0.057] | 0.005                                                                                           | [0.0105] |

**Supplementary Table 7:** Summary of differential taxa enriched in the Fulani and Non-Fulani from LEfSe analysis (p-values were determined with Wilcoxon's Rank Test).

| Phylum |                                                         | Fulani<br>(Mean % $\pm$ SD) | Non-Fulani<br>(Mean % $\pm$ SD) | p-value | LDA Score |
|--------|---------------------------------------------------------|-----------------------------|---------------------------------|---------|-----------|
|        | Bacteroidetes                                           | 23.23 $\pm$ 14              | 13.8 $\pm$ 9                    | 0.04    | 5.0       |
|        | Firmicutes                                              | 66.38 $\pm$ 18              | 77.63 $\pm$ 12                  | 0.047   | 5.0       |
|        | Actinobacteria                                          | 0.54 $\pm$ 0.5              | 1.27 $\pm$ 1.6                  | 0.04    | 3.5       |
| Class  |                                                         |                             |                                 |         |           |
|        | Clostridia                                              | 50.62 $\pm$ 15.63           | 65.05 $\pm$ 17.44               | 0.0055  | 5.0       |
|        | Bacteroidia                                             | 22.09 $\pm$ 13.81           | 13.81 $\pm$ 9.26                | 0.021   | 5.0       |
| Order  |                                                         |                             |                                 |         |           |
|        | Clostridiales                                           | 50.62 $\pm$ 15.63           | 65.05 $\pm$ 17.44               | 0.0055  | 5.0       |
|        | Bacteroidales                                           | 22.09 $\pm$ 13.81           | 13.81 $\pm$ 9.26                | 0.021   | 5.0       |
| Family |                                                         |                             |                                 |         |           |
|        | <i>Lachnospiraceae</i>                                  | 20 $\pm$ 8.63               | 29.3 $\pm$ 15.55                | 0.019   | 4.75      |
|        | <i>Ruminococcaceae</i>                                  | 13.11 $\pm$ 6.40            | 20.09 $\pm$ 9.90                | 0.044   | 4.5       |
|        | <i>Christensenellaceae</i>                              | 0.18 $\pm$ 0.2              | 1.18 $\pm$ 1.4                  | 0.012   | 4.0       |
| Genus  |                                                         |                             |                                 |         |           |
|        | <i>Blautia</i>                                          | 2.96 $\pm$ 2.3              | 6.64 $\pm$ 7.9                  | 0.045   | 4.25      |
|        | <i>Ruminococcaceae</i><br>UCG002                        | 0.4 $\pm$ 0.52              | 1.7 $\pm$ 1.74                  | 0.0012  | 4.10      |
|        | <i>Christensenellaceae</i><br>R7 group                  | 0.18 $\pm$ 0.2              | 1.17 $\pm$ 1.4                  | 0.025   | 4.0       |
|        | <i>Eubacterium</i><br><i>coprostanoligenes</i><br>group | 0.5 $\pm$ 0.38              | 1.4 $\pm$ 1.46                  | 0.019   | 3.7       |
|        | <i>Ruminococcus</i> 1                                   | 0.4 $\pm$ 0.5               | 1.1 $\pm$ 0.81                  | 0.0031  | 3.6       |
|        | <i>Veillonella</i>                                      | 1.7 $\pm$ 2.84              | 0.6 $\pm$ 1.24                  | 0.028   | 3.8       |
|        | <i>Eubacterium</i><br><i>rectale</i> group              | 2.72 $\pm$ 2                | 1.37 $\pm$ 1                    | 0.03    | 3.9       |
|        | <i>Alloprevotella</i>                                   | 2.2 $\pm$ 2.06              | 0.9 $\pm$ 1.16                  | 0.0046  | 4.0       |
|        | <i>Prevotella</i> 2                                     | 2.85 $\pm$ 2.6              | 0.96 $\pm$ 1                    | 0.039   | 4.1       |
|        | <i>Prevotella</i> 9                                     | 15.9 $\pm$ 9.72             | 10.2 $\pm$ 7.57                 | 0.035   | 4.7       |

**Supplemental Figure 1:** Relative Abundance of Microbial Taxa in the Gut of Fulani and Non-Fulani at the Phylum level

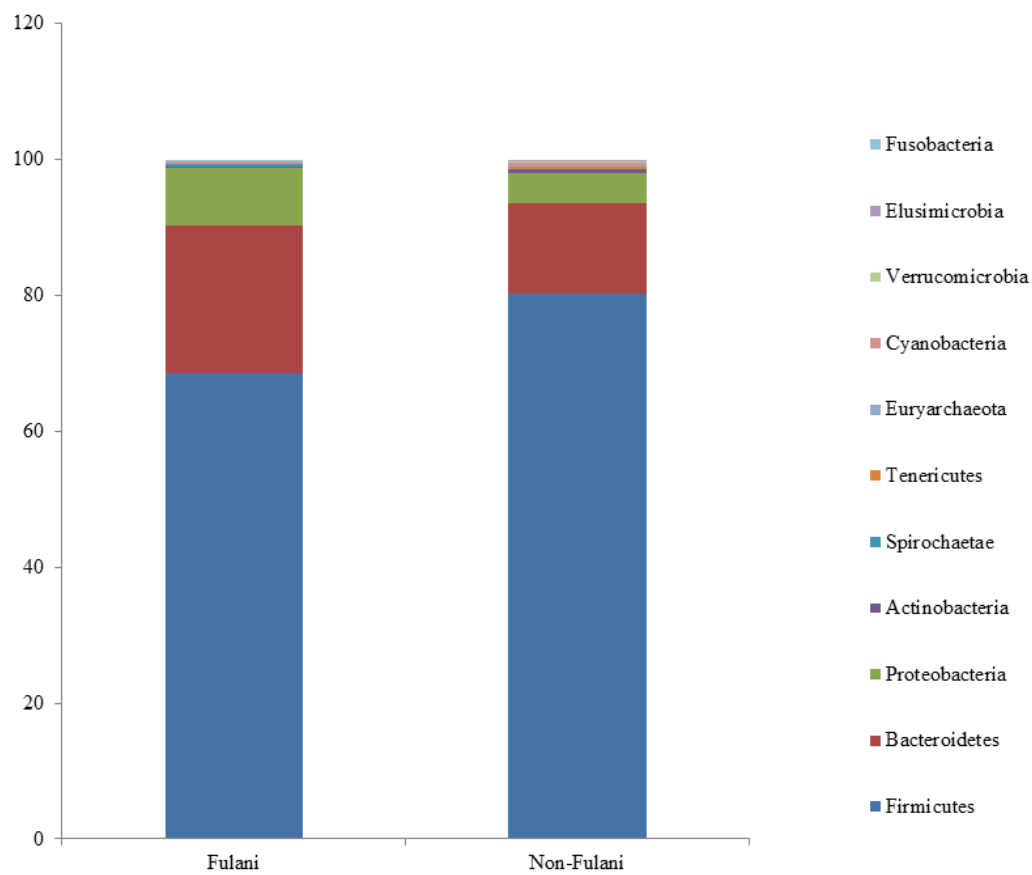

**Supplemental Figure 2.** Differences in abundance of microbial taxa in the fecal microbiota of Fulani (red bars) and Non-Fulani (blue bars). Bars that exceed the LDA score of 2 depict significant different abundance of the particular microbial taxon in the fecal microbiota between the two study groups.

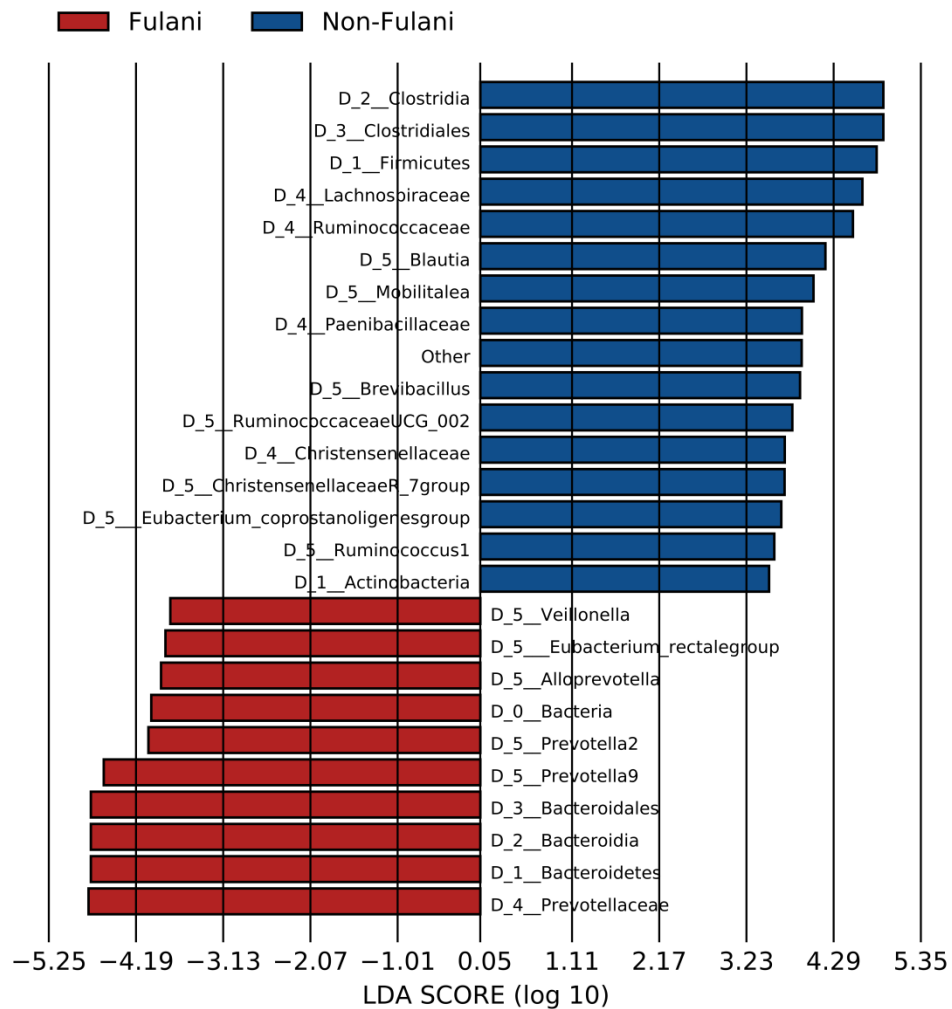



**Supplemental Figure3.** Predictive enrichment of significantly different functional capabilities of the microbiome of Fulani (red) and Non-Fulani (blue). Bars that exceed the LDA score of 2 depict significant abundance of the particular predicted pathway in the fecal microbiota between the two study groups.

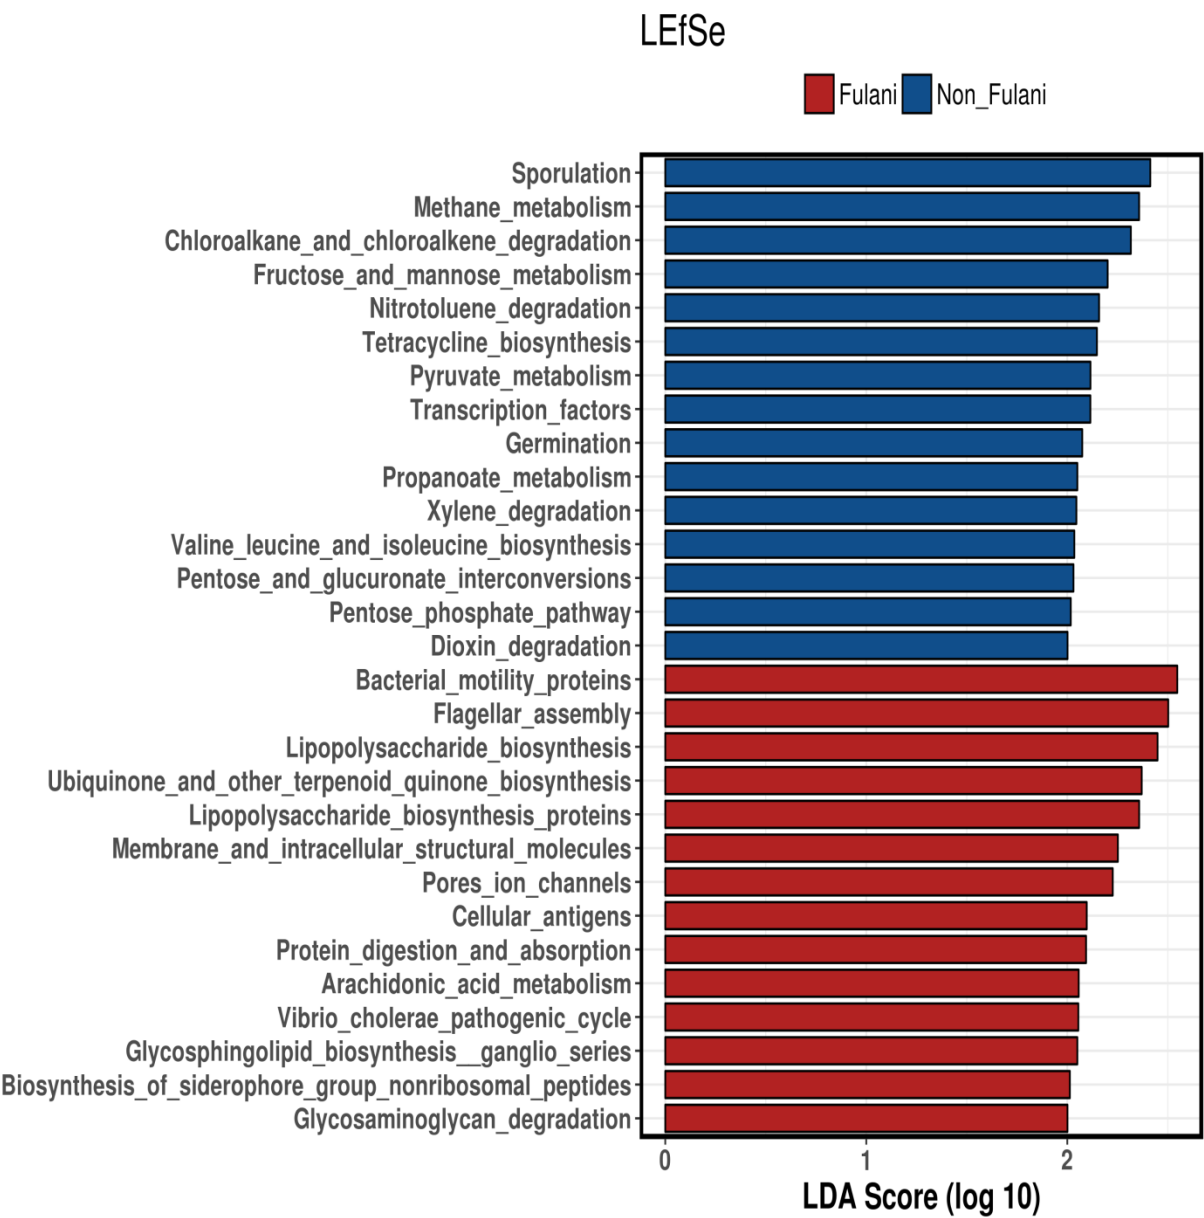

**Supplemental Figure 4.** RDA plot based on Bray-Curtis distances indicating children  $\leq 11$  years in both groups

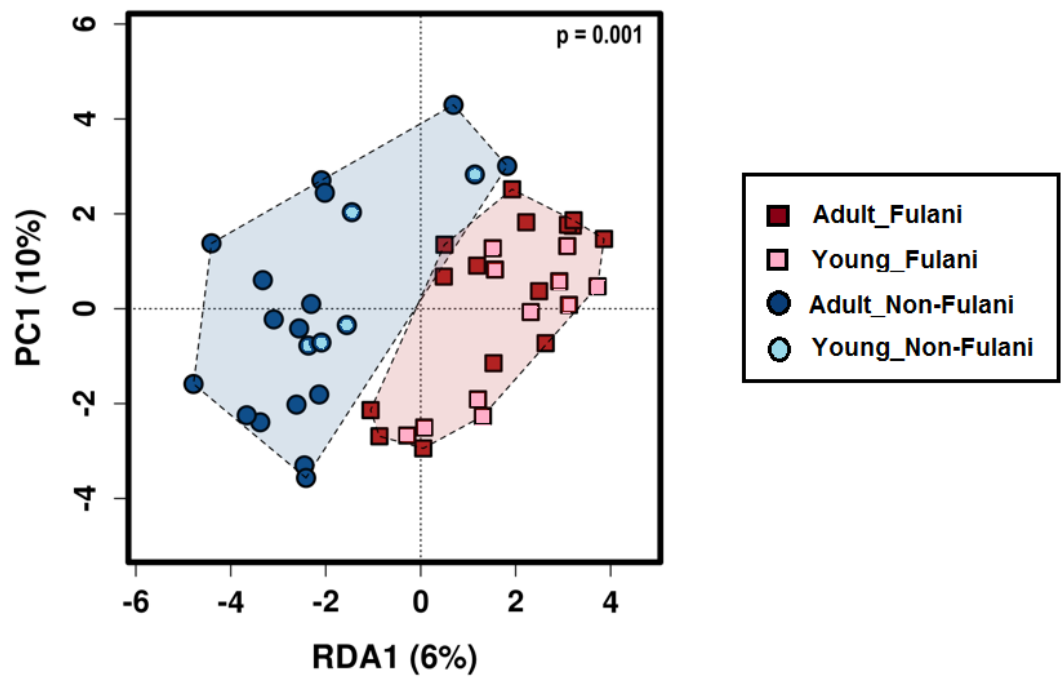

**Supplemental Figure 5.** Beta diversity. RDA plot based on Bray-Curtis distances shows patterns of significant separation between the Fulani (red boxes) and the Jarawa (Non-Fulani, blue circles) children at the OUT level ( $p = 0.005$ ). ANOSIM of Bray curtis distances for the Fulani and non-Fulani children:  $R = 0.337$ ,  $p = 0.019$

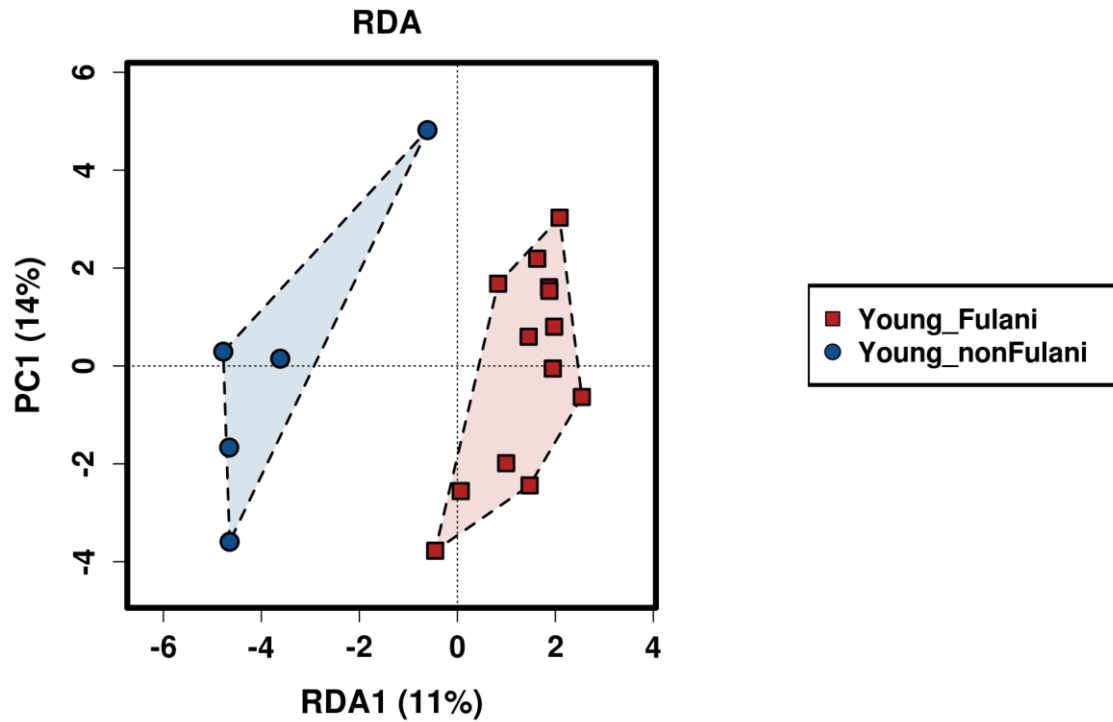

**Supplemental Figure 6.** . Beta diversity. RDA plot based on Bray-Curtis distances shows patterns of significant separation between the Fulani (red boxes) and the Jarawa (Non-Fulani, blue circles) adolescents/adults at the OUT ( $p = 0.001$ ) ANOSIM of Bray Curtis Distances for the Fulani and non-Fulani adults:  $R = 0.123$ ,  $p = 0.004$

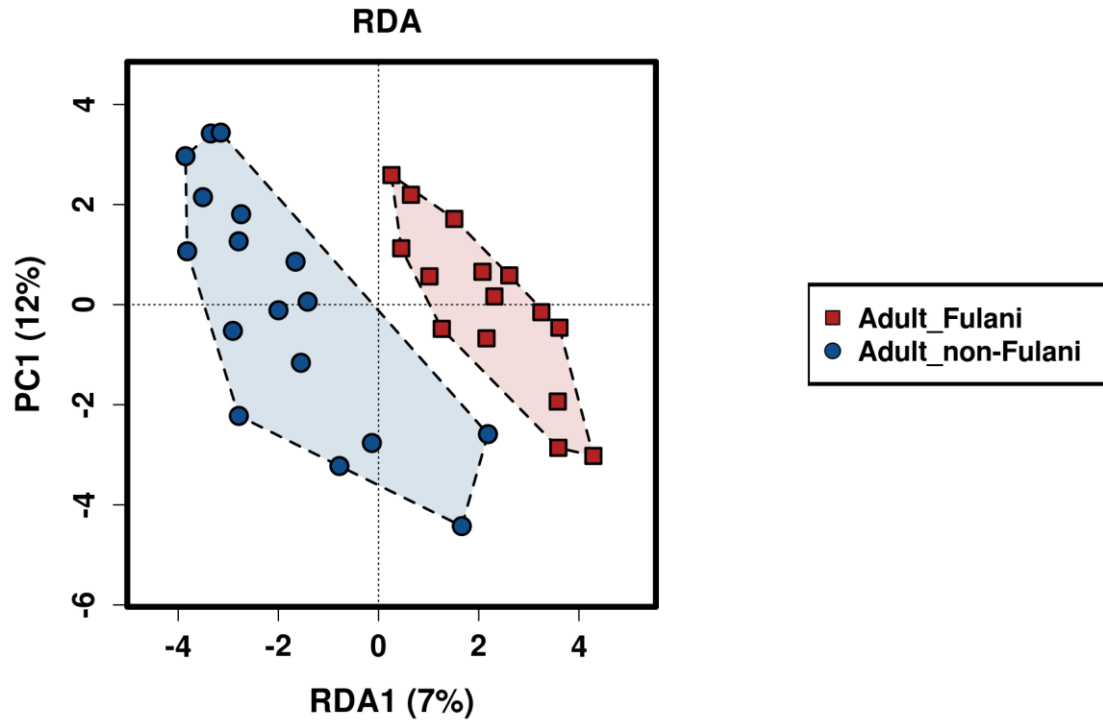

**Supplemental Figure 7.** Alpha diversity across age. Red dots indicate Fulani, blue dots non Fulani.

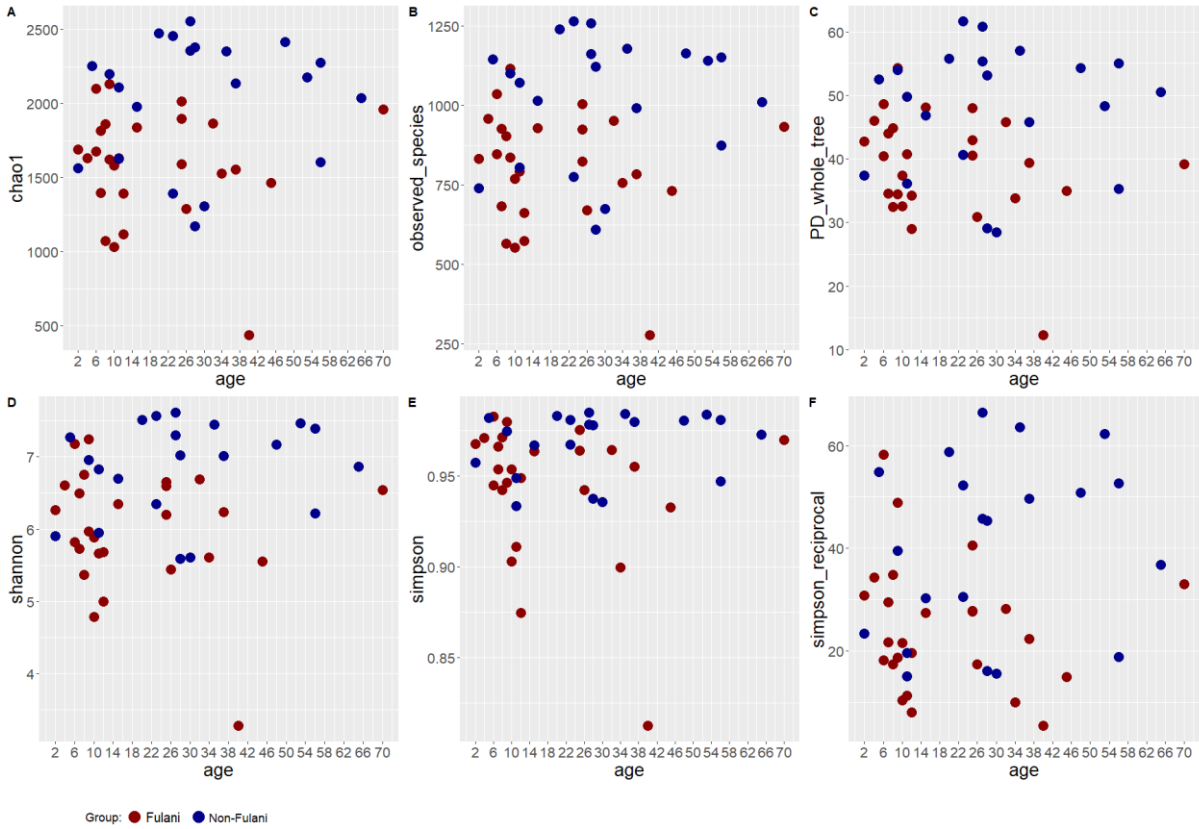

Supplement: Supplementary file [file 17615885]
